# Supplementary material for: Designing a 0D/1D S-Scheme Heterojunction of Cadmium Selenide and Polymeric Carbon Nitride for Photocatalytic Water Splitting and Carbon Dioxide Reduction
Source: MDPI journal article supplement (doi:10.3390/molecules27196286), 2022-09-23
Supplement: s1 [file s1]

## Supplementary Materials

# Designing a 0D/1D S-Scheme Heterojunction of Cadmium Selenide and Polymeric Carbon Nitride for Photocatalytic Water Splitting and Carbon Dioxide Reduction

Yayun Wang <sup>1</sup>, Haotian Wang <sup>1</sup>, Yuke Li <sup>2</sup>, Mingwen Zhang <sup>3,\*</sup> and Yun Zheng <sup>1,\*</sup>

<sup>1</sup> Xiamen Key Laboratory of Optoelectronic Materials and Advanced Manufacturing, College of Materials Science and Engineering, Huaqiao University, Xiamen 361021, China

<sup>2</sup> Department of Chemistry and Centre for Scientific Modeling and Computation, Chinese University of Hong Kong, Shatin, Hong Kong, China

<sup>3</sup> Fujian Provincial Key Lab of Coastal Basin Environment, School of Materials and Environment Engineering, Fujian Polytechnic Normal University, Fuqing 350300, China

\* Correspondence: mwzhang1989@163.com (M.Z.); zheng-yun@hqu.edu.cn (Y.Z.)

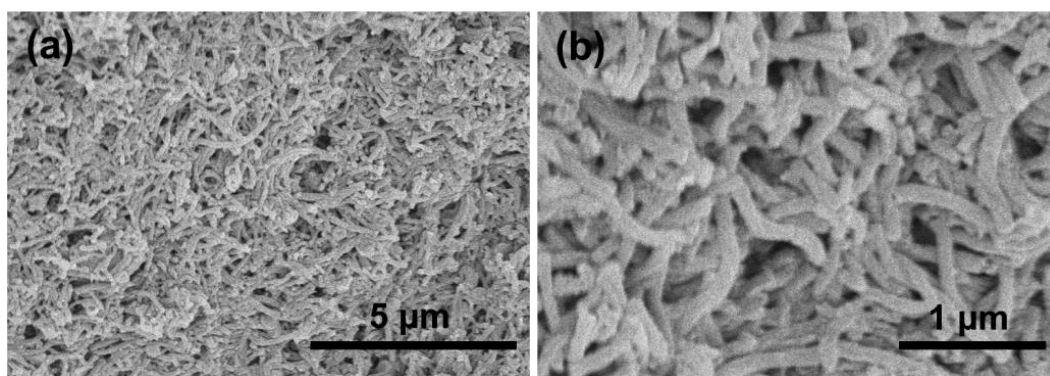

**Figure S1.** SEM images of CN nanorods.

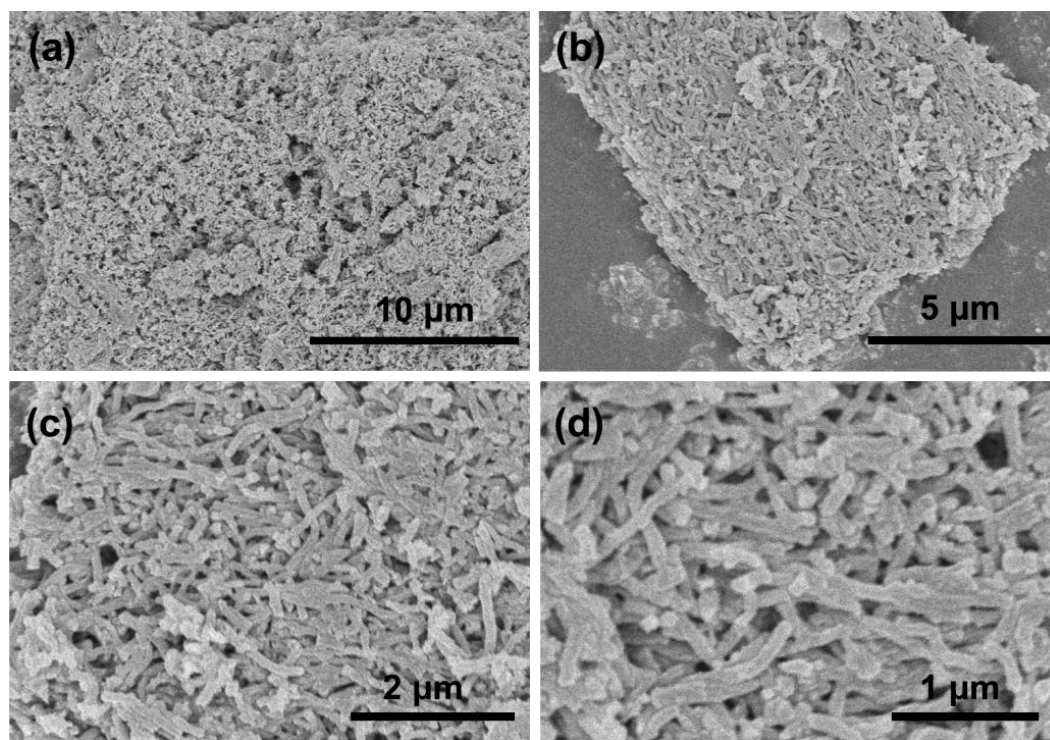

**Figure S2.** SEM images of 5% CdSe/CN hybrid.

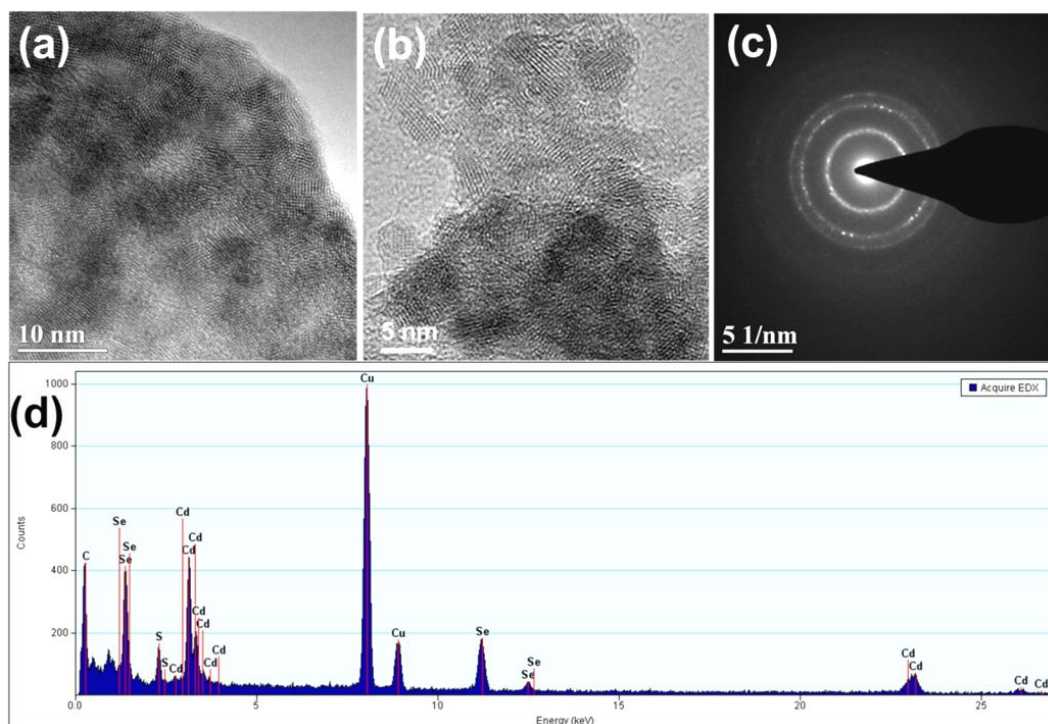

**Figure S3.** (a) TEM image, (b) HRTEM image, (c) SAED image, and (d) EDX image of CdSe QD solutions.

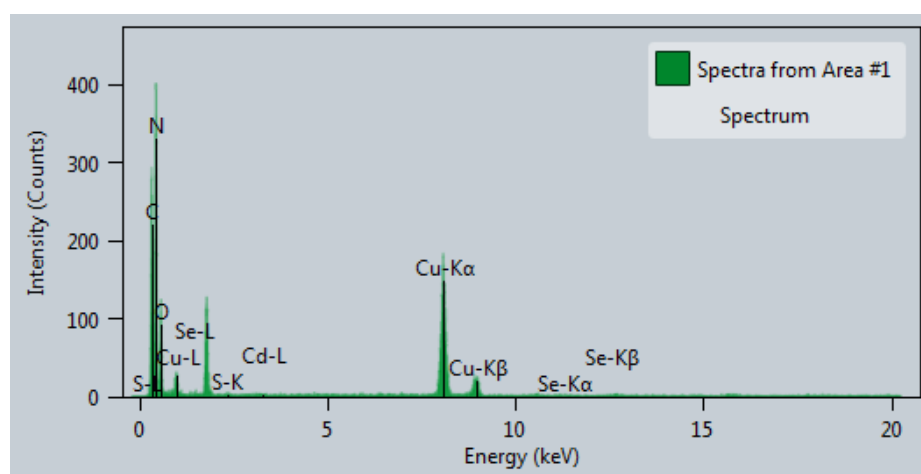

**Figure S4.** TEM-EDX images of 5% CdSe/CN hybrid.

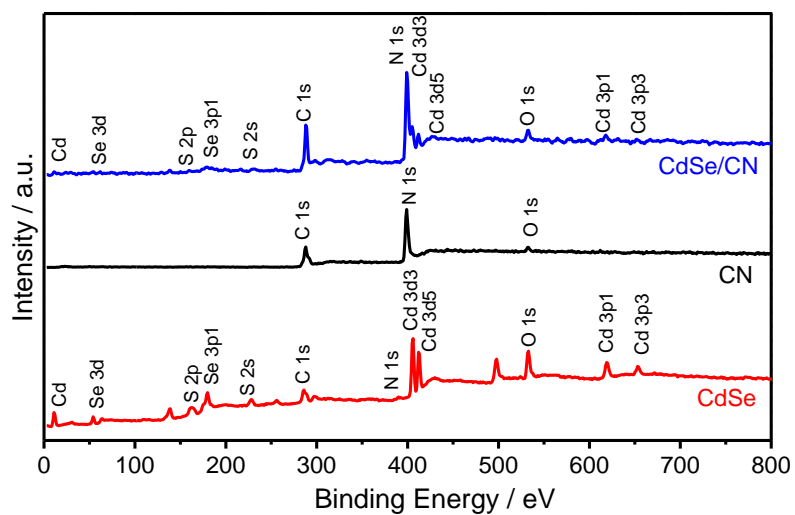

**Figure S5.** XPS survey spectra of CN, CdSe and 5% CdSe/CN hybrid.

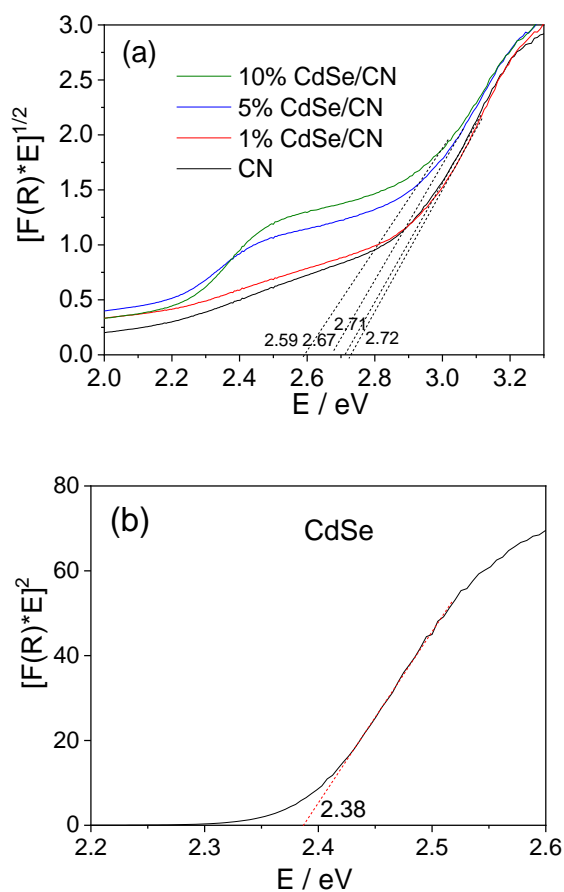

**Figure S6.** Tauc plots of (a) CN nanorods, CdSe/CN hybrids and (b) CdSe QDs.

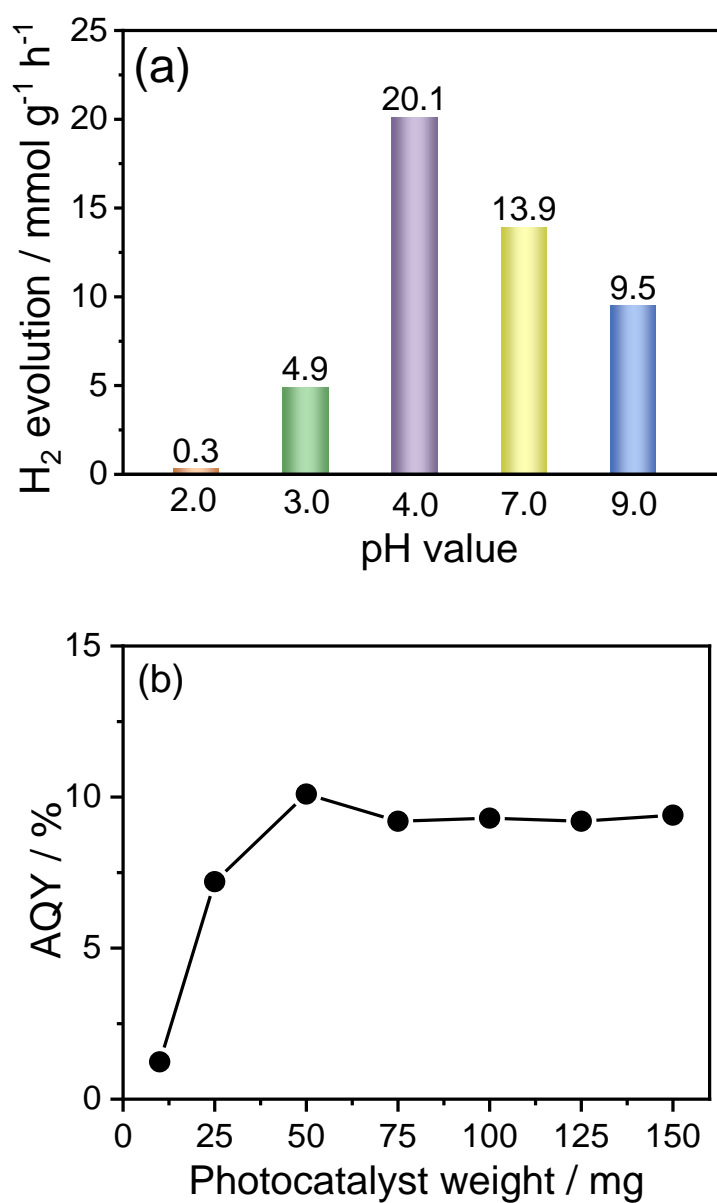

**Figure S7.** (a) Amount of hydrogen evolved from 5% CdSe/CN using ascorbic acid (H<sub>2</sub>A) as sacrificial reagent by changing pH value. (b) AQY of 5% CdSe/CN for photocatalytic H<sub>2</sub> evolution with different photocatalyst weight.

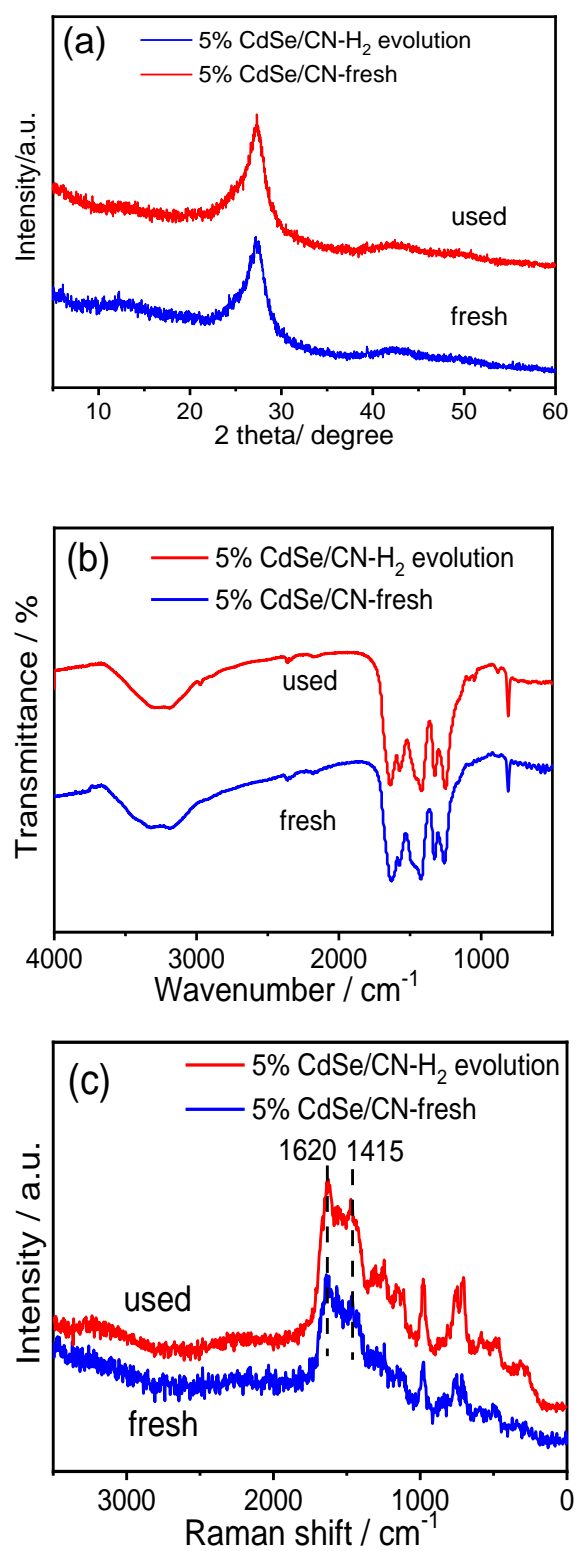

**Figure S8.** (a) XRD pattern, (b) FT-IR spectra and (c) UV-Raman spectra of 5% CdSe/CN before and after the hydrogen evolution reaction.

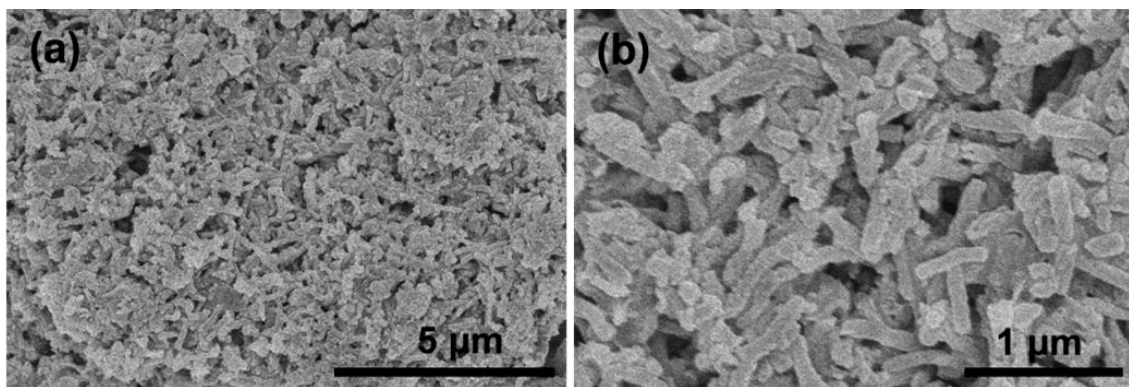

**Figure S9.** SEM images of 5% CdSe/CN after photocatalytic reactions.

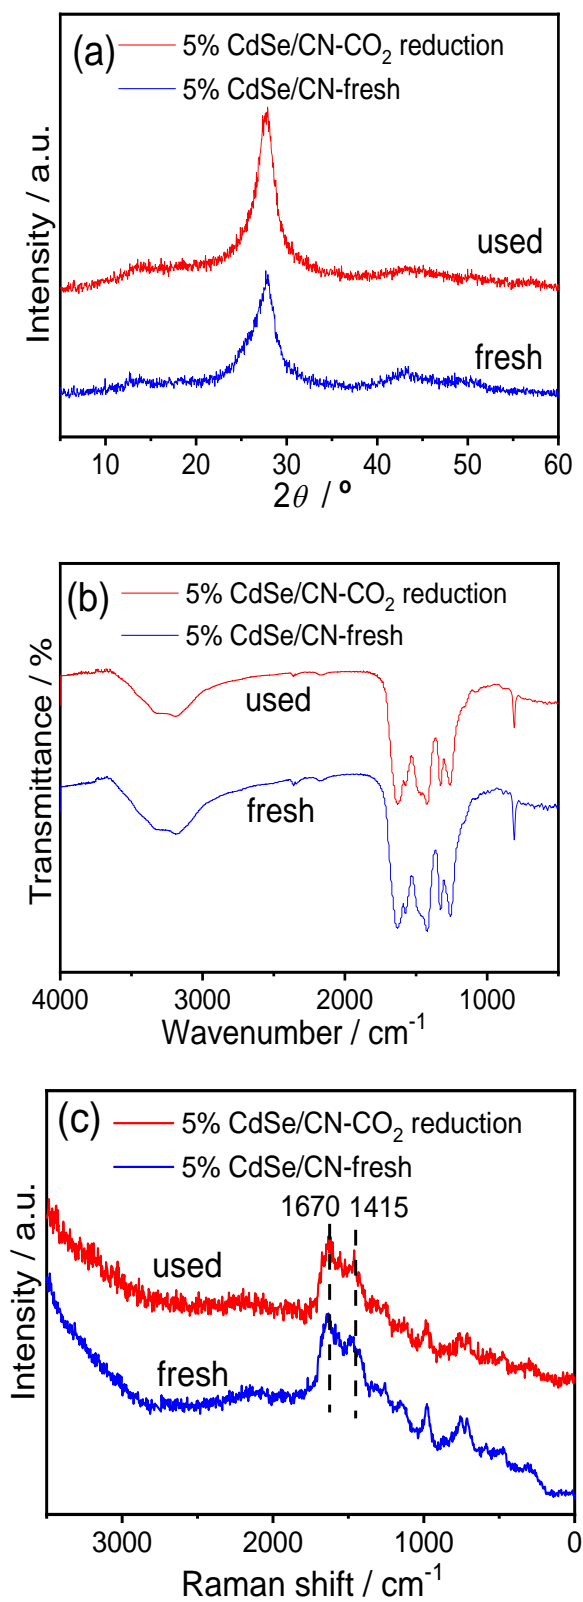

**Figure S10.** (a) XRD pattern, (b) FT-IR spectra, and (c) UV-Raman spectra of 5% CdSe/CN before and after the  $\text{CO}_2$  conversion reaction.



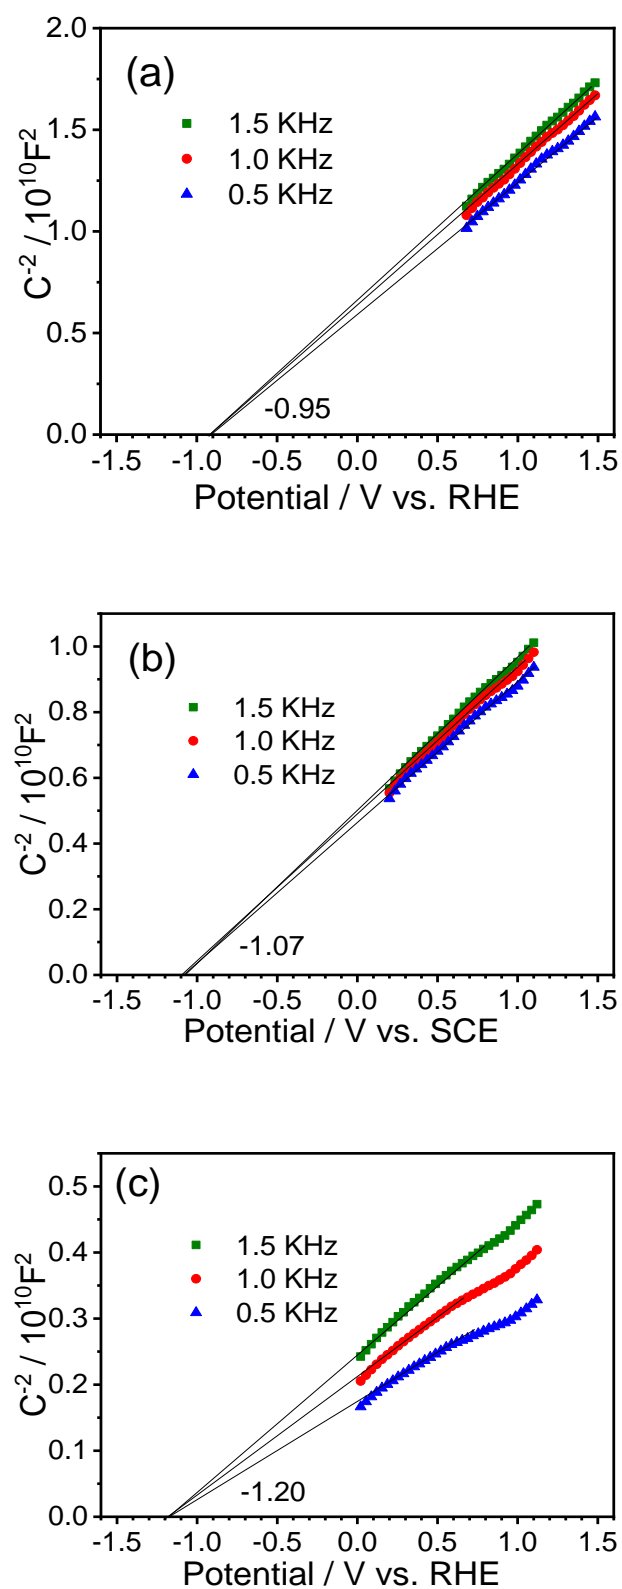

**Figure S11.** Mott-Schottky plots of (a) CN nanorods, (b) 5% CdSe/CN and (c) CdSe QDs.

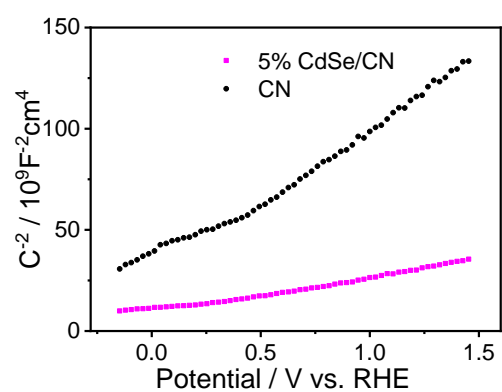

**Figure S12.** Mott-Schottky plots of CN nanorods and 5% CdSe/CN to calculate the charge carrier density.

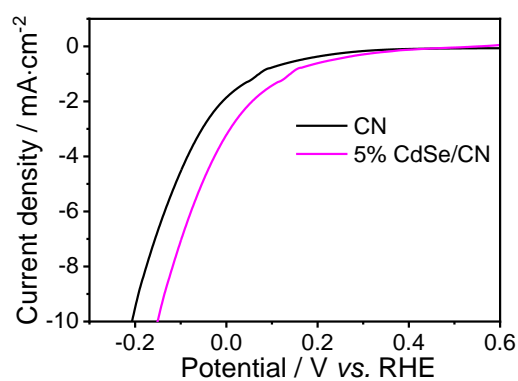

**Figure S13.** Linear sweep voltammetry for CN and 5% CdSe/CN.

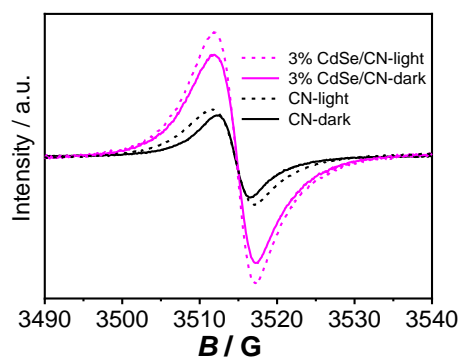

**Figure S14.** EPR spectra of CN and 5% CdSe/CN.

**Table S1.** Fitted fluorescence decay components of CN nanorods and 5% CdSe/CN ( $\lambda = 375$  nm).

| Sample      | $\tau_1$ (ns) | $\tau_2$ (ns) | $\tau_{\text{average}}$ (ns) | $\chi^2$ |
|-------------|---------------|---------------|------------------------------|----------|
| CN nanorods | 1.15 (86.3%)  | 9.71 (13.7%)  | 2.32                         | 0.986    |
| 5% CdSe/CN  | 1.03 (76.9%)  | 5.83 (23.1%)  | 2.14                         | 0.993    |

short lifetime ( $\tau_1$ ), long lifetime ( $\tau_2$ ) and average lifetime ( $\tau_{\text{average}}$ ).

**Table S2.** Literature values of AQY for CN-based photocatalysts in hydrogen evolution.

| Photocatalyst                                                             | Photocatalyst loading<br>(mg) | Co-catalysts | Incident wavelength; $\lambda_i$<br>(nm) | AQY (%) | Reference |
|---------------------------------------------------------------------------|-------------------------------|--------------|------------------------------------------|---------|-----------|
| CdSe/CN                                                                   | 20                            | 3 wt % Pt    | 420 nm                                   | 10.2    | This work |
| 18 wt% CdSe-TF-g-C <sub>3</sub> N <sub>4</sub> sheet                      | 5                             | /            | 460 nm                                   | 13.9    | [39]      |
| Porous g-C <sub>3</sub> N <sub>4</sub> sheet                              | 50                            | 3 wt % Pt    | 420 nm                                   | 1.5     | [68]      |
|                                                                           |                               |              | 580nm                                    | 6.3     |           |
|                                                                           |                               |              | 680nm                                    | 4.4     |           |
| Carbon QDs on g-C <sub>3</sub> N <sub>4</sub> nano<br>tubes               | 50                            | 3 wt % Pt    | 420 nm                                   | 10.9    | [69]      |
| P-doped g-C <sub>3</sub> N <sub>4</sub> nanoflakes                        | 10                            | 3 wt % Pt    | 420 nm                                   | 6.7     | [70]      |
|                                                                           |                               |              | 600nm                                    | 0.2     |           |
| Crystalline g-C <sub>3</sub> N <sub>4</sub> nanosheet                     | 50                            | 3 wt % Pt    | 420 nm                                   | 9.0     | [71]      |
| Thin, porous g-C <sub>3</sub> N <sub>4</sub> sheet                        | 50                            | 3 wt% Pt     | 425 nm                                   | 6.8     | [72]      |
| Defect-rich amorphous carbon<br>nitride (DACN)                            | 50                            | 3 wt% Pt     | 400 nm                                   | 34.4    | [73]      |
|                                                                           |                               |              | 425nm                                    | 31.9    |           |
| CdS QDs on WS <sub>2</sub> /g-C <sub>3</sub> N <sub>4</sub><br>nanosheets | 10                            | /            | 400 nm                                   | 5.4     | [74]      |
| Few-layered polymeric CN                                                  | 50                            | 3 wt% Pt     | 405 nm                                   | 11.3    | [75]      |
| C <sub>3</sub> N <sub>4</sub> sheet/MnO <sub>2</sub>                      | 100                           | /            | 420 nm                                   | 3.8     | [76]      |

**Table S3.** Various controlled experiments for CO<sub>2</sub> reduction.

| Entry | Reaction Conditions                          | CO<br>[μmol]        | H <sub>2</sub><br>[μmol] | CO+H <sub>2</sub><br>[μmol] |
|-------|----------------------------------------------|---------------------|--------------------------|-----------------------------|
| 1     | (a)                                          | 7.0                 | 1.1                      | 8.1                         |
| 2     | Without catalyst                             | n.d. <sup>(b)</sup> | n.d.                     | -                           |
| 3     | In dark                                      | n.d.                | n.d.                     | -                           |
| 4     | Using Ar instead of CO <sub>2</sub>          | n.d.                | 0.5                      | 0.5                         |
| 5     | Without triethanolamine                      | n.d.                | n.d.                     | -                           |
| 6     | Without bipyridine                           | n.d.                | <0.1                     | <0.1                        |
| 7     | Without CoCl <sub>2</sub> ·6H <sub>2</sub> O | n.d.                | <0.1                     | <0.1                        |

(a) Reaction conditions: 5% CdSe/CN catalyst (20 mg), 2,2'-bipyridyl (15 mg), H<sub>2</sub>O (1 mL), acetonitrile (3 mL), triethanolamine (1 mL), CoCl<sub>2</sub>·6H<sub>2</sub>O (1 μmol), CO<sub>2</sub> (1 bar), 40 °C, 1 h, and λ > 420 nm; (b) Not detectable.

**Table S4.** The reactivity of photocatalysts for CO<sub>2</sub> reduction.

| Entry | Catalyst    | CO [μmol] | H <sub>2</sub> [μmol] | CO+H <sub>2</sub> [μmol] | Turn over<br>number <sup>(a)</sup> | Selectivity<br><sup>(b)</sup> / % |
|-------|-------------|-----------|-----------------------|--------------------------|------------------------------------|-----------------------------------|
| 1     | CN nanorods | 8.9       | 0.3                   | 9.2                      | 9.2                                | 96.7                              |
| 2     | CdSe        | 0.5       | 0.1                   | 0.6                      | 0.6                                | 83.3                              |
| 3     | 1% CdSe/CN  | 15.2      | 0.4                   | 15.6                     | 15.6                               | 97.4                              |
| 4     | 3% CdSe/CN  | 17.8      | 0.4                   | 18.2                     | 18.2                               | 97.8                              |
| 5     | 5% CdSe/CN  | 23.2      | 0.5                   | 23.7                     | 23.7                               | 97.9                              |
| 6     | 7% CdSe/CN  | 20.8      | 0.6                   | 21.4                     | 21.4                               | 97.2                              |
| 7     | 10% CdSe/CN | 18.5      | 0.6                   | 19.1                     | 19.1                               | 96.9                              |

Reaction conditions: catalyst (30 mg), 2,2'-bipyridyl (15 mg), H<sub>2</sub>O (1 mL), acetonitrile (3 mL), triethanolamine (1 mL), CoCl<sub>2</sub>·6H<sub>2</sub>O (1 μmol), CO<sub>2</sub> (1 bar), 30 °C, 1 h, and λ > 420 nm. (a) Turn over number = (mol amount of CO and H<sub>2</sub>)/(mol amount of cobalt ion); (b) Selectivity =  $n_{\text{CO}}/n_{(\text{CO}+\text{H}_2)} \times 100$ ; (c) Not detectable.

**Table S5.** Calculated values of equivalent circuit elements for CN and 5% CdSe/CN samples.

| Samples    | R <sub>1</sub> [Ω] | R <sub>2</sub> [Ω]   | C <sub>2</sub> [F]    |
|------------|--------------------|----------------------|-----------------------|
| CN         | 145.8              | 1.09×10 <sup>6</sup> | 1.52×10 <sup>-6</sup> |
| 5% CdSe/CN | 124.2              | 9.73×10 <sup>5</sup> | 3.57×10 <sup>-6</sup> |
